# Supplementary material for: Constitutive centromere-associated network contacts confer differential stability on CENP-A nucleosomes in vitro and in the cell
Source: PubMed Central journal article supplement — Mol Biol Cell. 2018 Mar 15;29(6):751–62. doi: 10.1091/mbc.E17-10-0596 (PMC6003232; doi:10.1091/mbc.e17-10-0596), 2018-03-15

# Supplemental Materials

*Molecular Biology of the Cell*

Cao et al.

# Supplemental Figure S1

## A

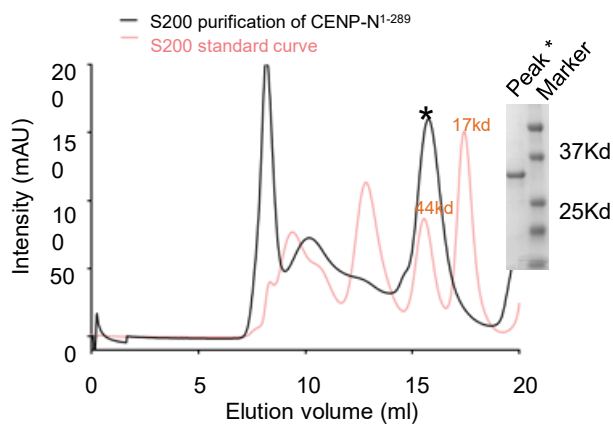

## B

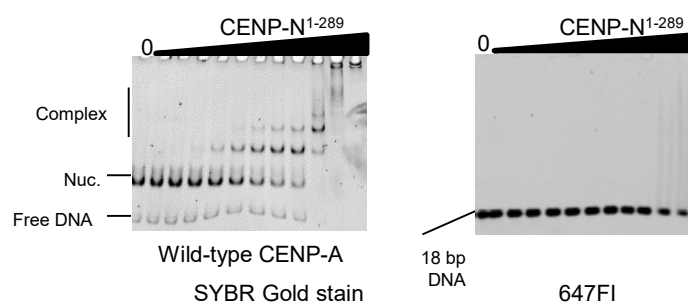

## C

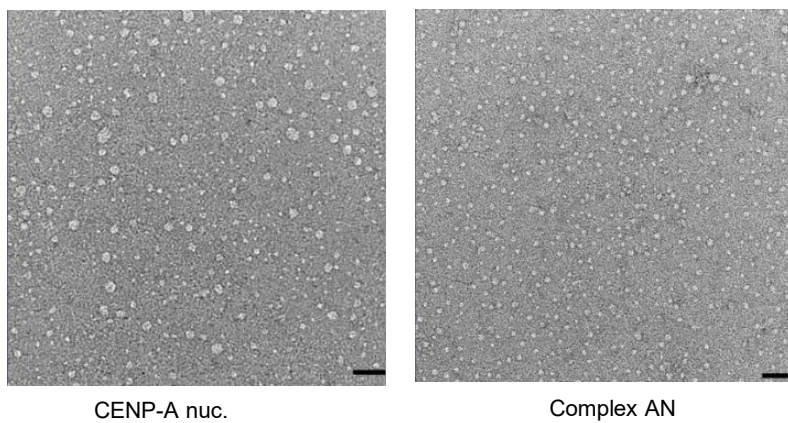

Supplemental Figure S2

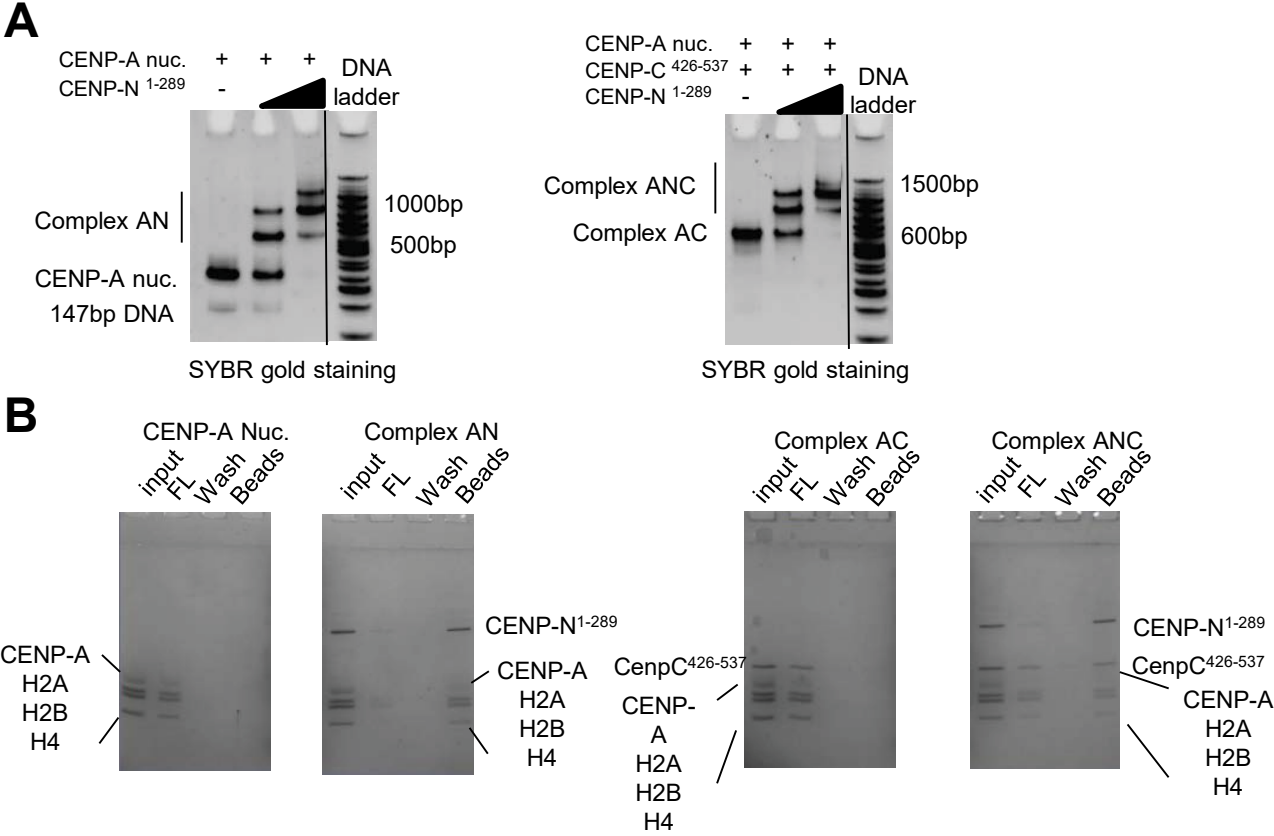

# Supplemental Figure S3

## A CENP-N AID-sfGFP Cell Line

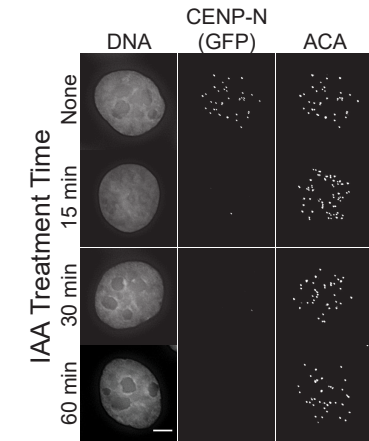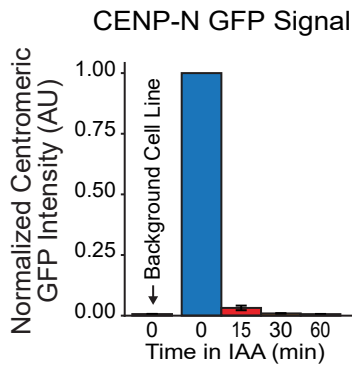

## B CENP-N AID-sfGFP, CENP-C AID-mRuby2-3xFlag Cell Line

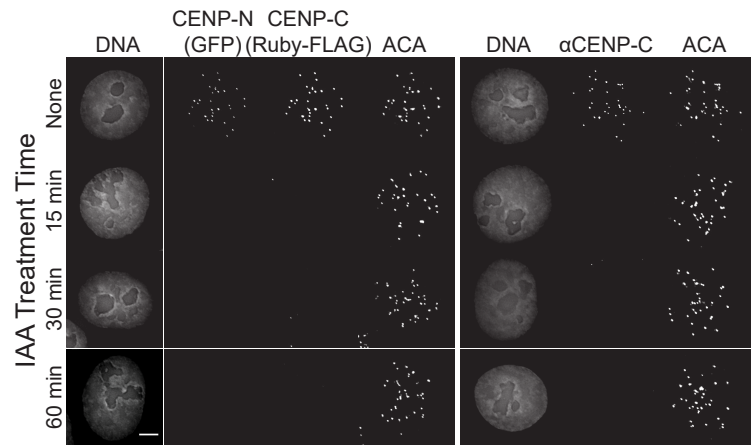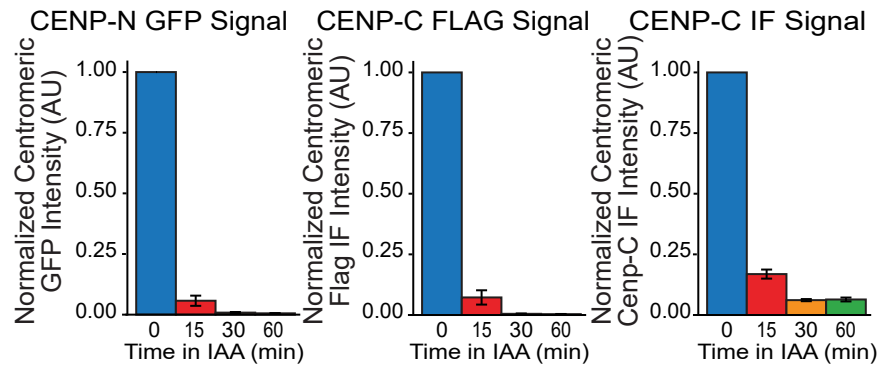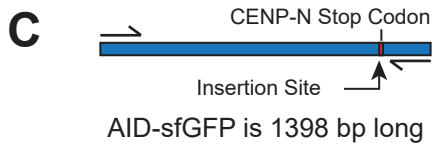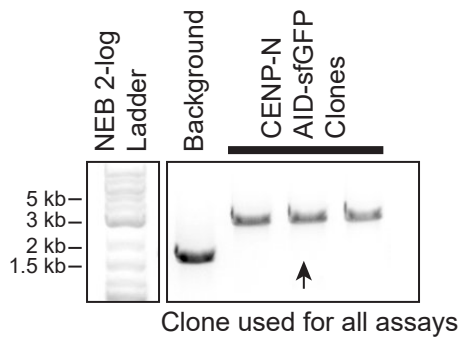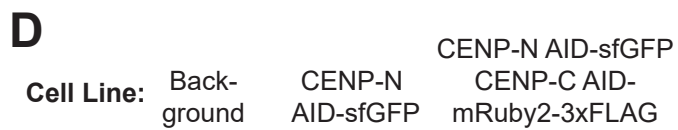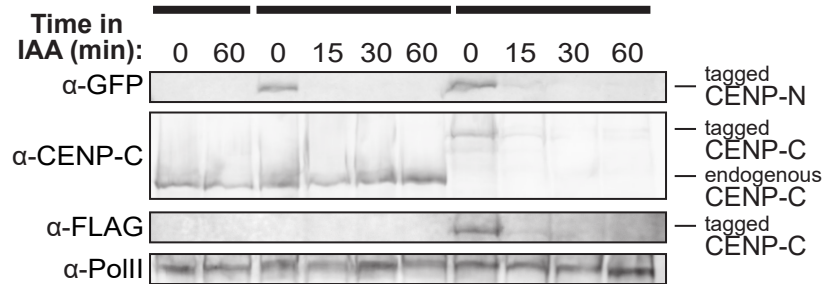

## Supplemental Figure S4

### A CENP-N mRuby2-3xFLAG tagged rescue construct expression

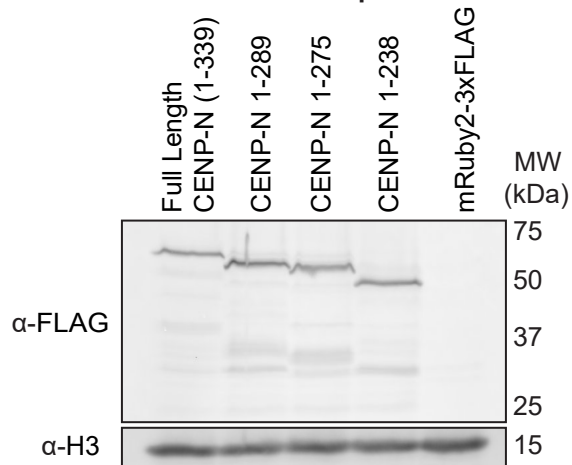

### B Degrade endogenous CENP-N, assay rescue by constructs

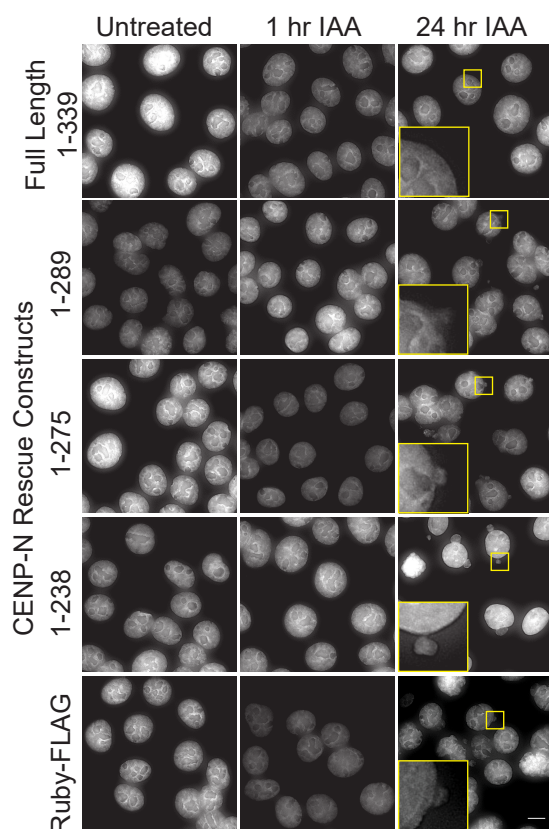

### C Percent cells with micronuclei

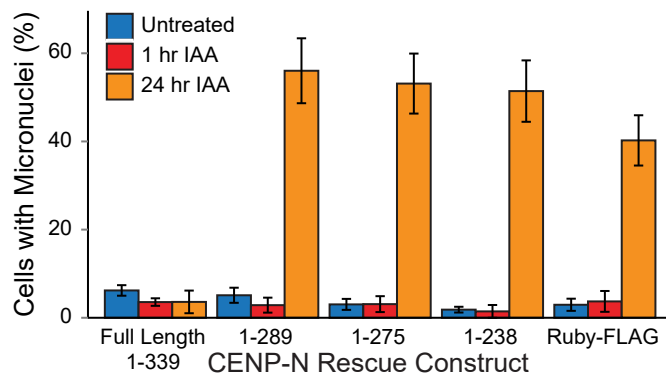

### D Endogenous CENP-N Localization

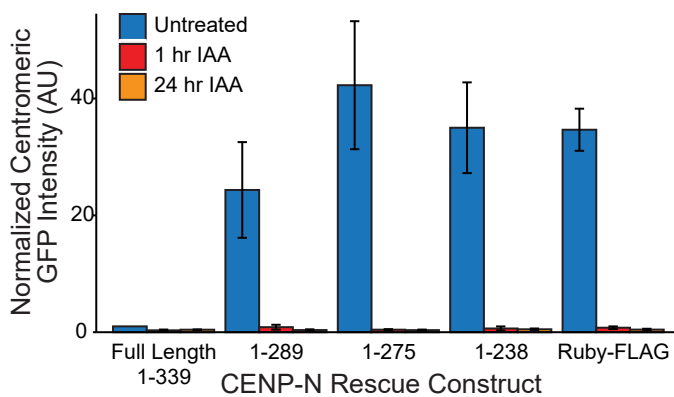

### E CENP-N Rescue Construct Localization

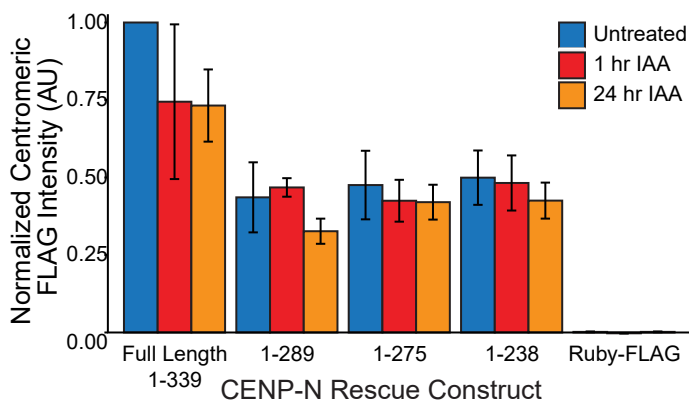

Supplemental Figure S5

**A** Degrade CENP-C and/or CENP-N during G1

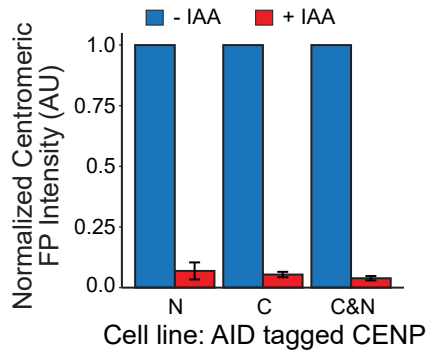

**B** Degrade CENP-C and/or CENP-N during G1 through G2 or S through G2

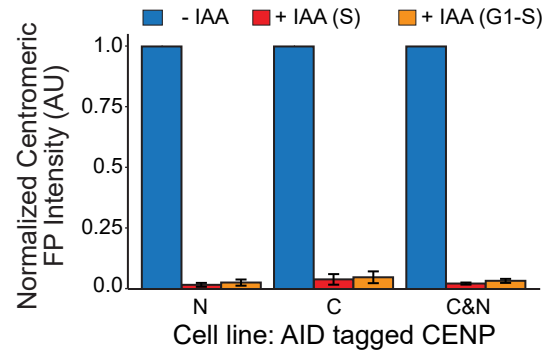

**C** Degrade CENP-C and/or CENP-N during G1

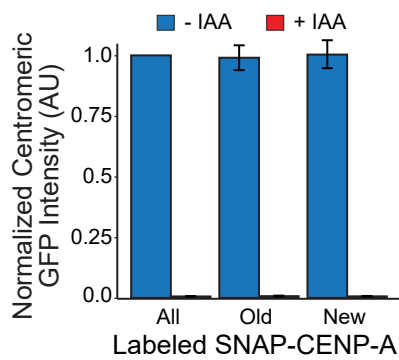

**D** Cell line with CENP-N-AID-GFP

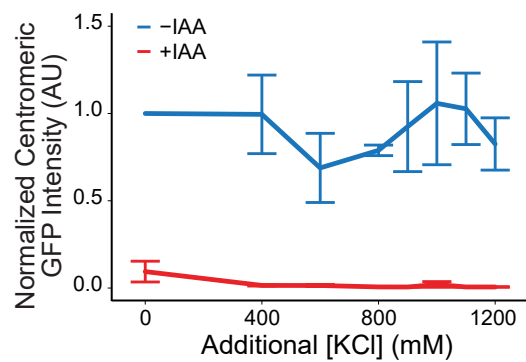

**E** Cell line with CENP-C-AID-YFP

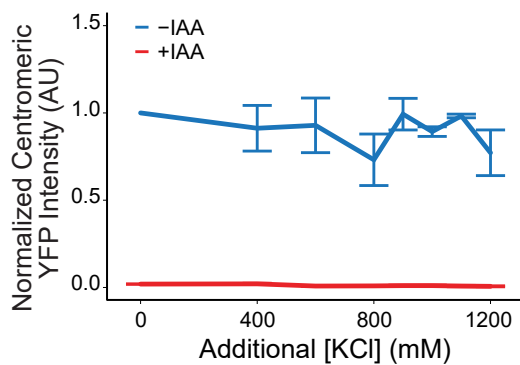

**F** Cell line with CENP-N-AID-GFP and CENP-C-AID-mRuby2-FLAG

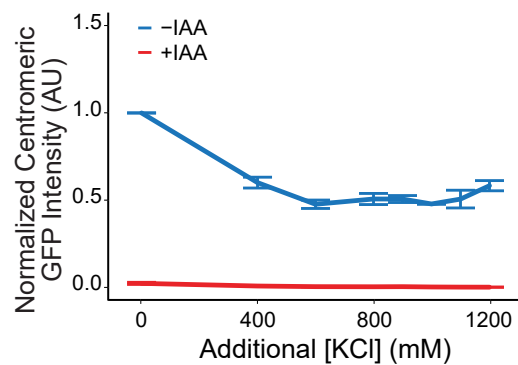

# Supplemental Figure S6

## A Cell Lines used in comparisons

- 1) Background Line (no AID tag) SNAP-CENP-A
  - 2) Background Line (no AID tag) SNAP-3xmyc-CENP-A
  - 3) CENP-N AID-sfGFP SNAP-CENP-A
  - 4) CENP-N AID-sfGFP SNAP-3xmyc-CENP-A
  - 5) CENP-N AID-EGFP CENP-A-SNAP
- (From Guo et al. 2017)

## B SNAP-tagged CENP-A total protein levels

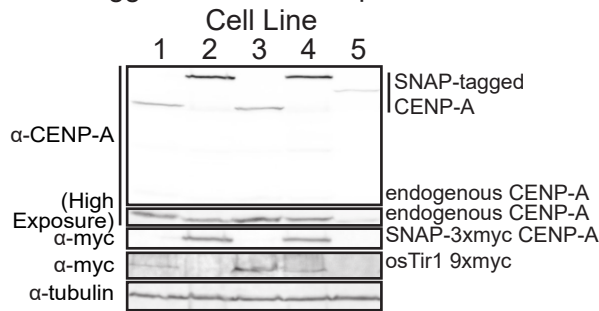

## C Centromeric TMR Star localization across cell lines

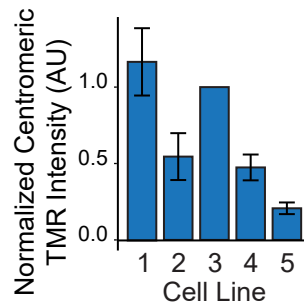

## D Centromeric GFP signal with 24hr IAA Treatment

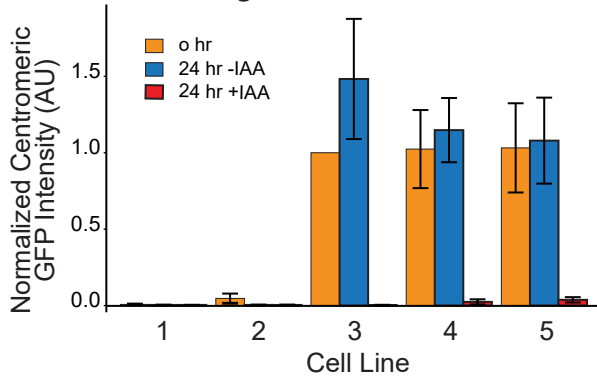

## E

### Centromeric TMR signal with 24hr IAA Treatment

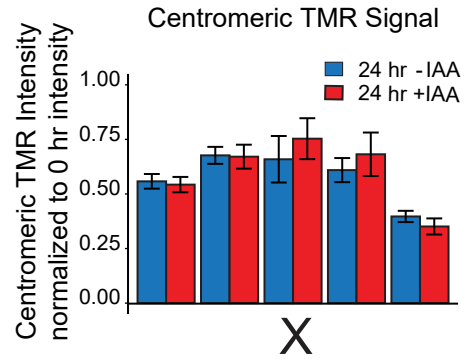

### Relative Change in Cell Number

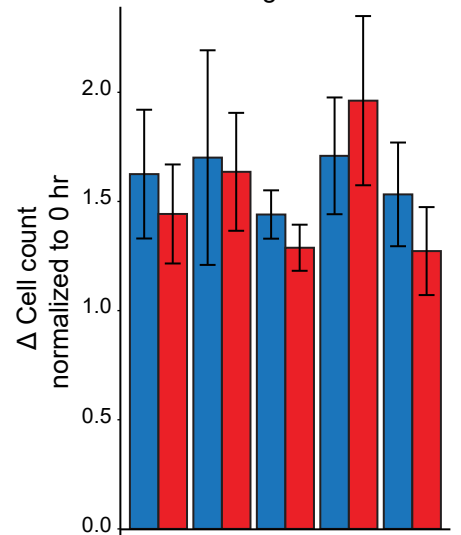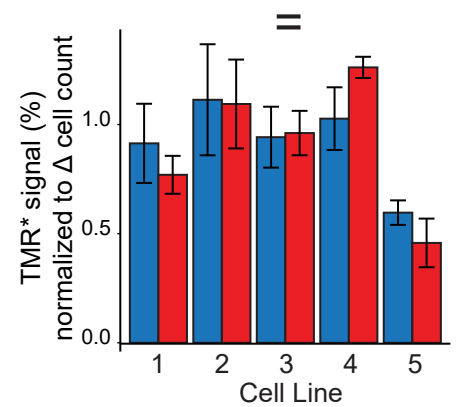

Supplement: mbc-29-751-s001.pdf [file mbc-29-751-s001.pdf]
